# Supplementary material for: Ultrafast correlated charge and lattice motion in a hybrid metal halide perovskite
Source: PubMed Central journal article supplement — Sci Adv. 2019 May 31;5(5):eaaw5558. doi: 10.1126/sciadv.aaw5558 (PMC6544455; doi:10.1126/sciadv.aaw5558), 2019-05-31
Supplement: aaw5558_SM.pdf [file aaw5558_SM.pdf]

## Supplementary Materials for

### Ultrafast correlated charge and lattice motion in a hybrid metal halide perovskite

Yang Lan, Benjamin J. Dringoli, David A. Valverde-Chávez, Carlito S. Ponseca Jr., Mark Sutton, Yihui He, Mercuri G. Kanatzidis, David G. Cooke\*

\*Corresponding author. Email: cooke@physics.mcgill.ca

Published 31 May 2019, *Sci. Adv.* **5**, eaaw5558 (2019)  
DOI: 10.1126/sciadv.aaw5558

#### This PDF file includes:

- Fig. S1. Static dielectric function of MAPI.
- Fig. S2. Conductivity of MAPI at  $\tau = 1$  ps.
- Fig. S3. Phase of pump-induced differential THz reflectivity at the  $\langle 11\bar{1} \rangle$  facet.
- Fig. S4. Amplitude of pump-induced differential THz reflectivity at the  $\langle 100 \rangle$  facet.
- Fig. S5. Time domain coherent oscillations of THz reflectivity without slow rise component at  $\langle 100 \rangle$  facet.
- Fig. S6. Fourier domain coherent oscillations of THz reflectivity without slow rise component at  $\langle 100 \rangle$  facet.
- Fig. S7. Time constants at  $\langle 100 \rangle$  facet.
- Fig. S8. Amplitude of pump-induced differential THz reflectivity at  $\langle 111 \rangle$  facet.
- Fig. S9. Time domain coherent oscillations of THz reflectivity without slow rise component at  $\langle 111 \rangle$  facet.
- Fig. S10. Fourier domain coherent oscillations of THz reflectivity without slow rise component at  $\langle 111 \rangle$  facet.
- Fig. S11. Time constants at  $\langle 111 \rangle$  facet.
- Fig. S12. Electric field in time domain of the reference THz probe pulse.
- Fig. S13. Power spectrum of the reference THz probe pulse.
- Fig. S14. Pump-induced THz reflectivity change for different probe field strengths.
- Table S1. Parameters describing MAPI dielectric properties.
- Reference (37)

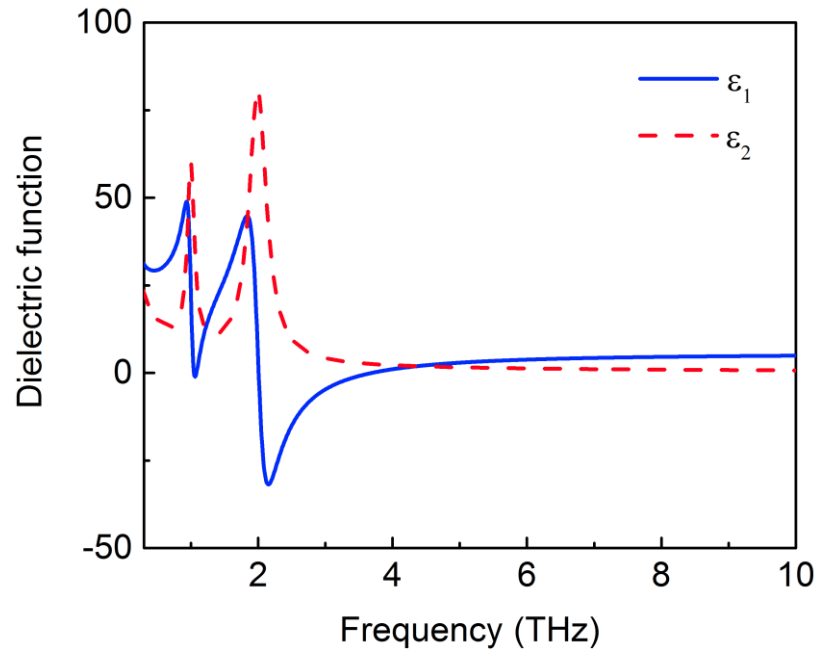

**Fig. S1. Static dielectric function of MAPI.** Real part (blue solid line) and imaginary part (red dash line) of MAPI dielectric function from the model in Ref (31).

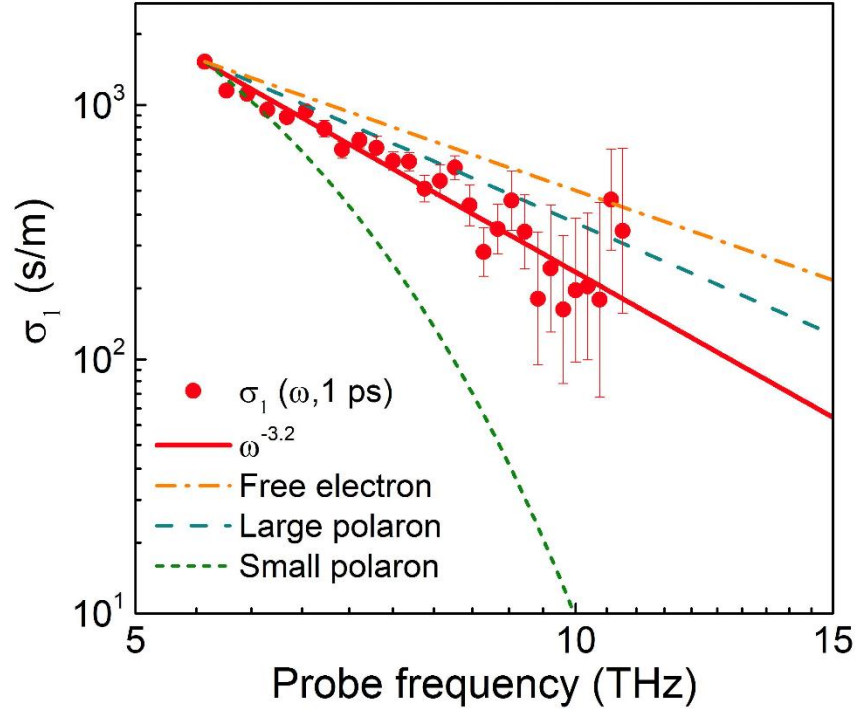

**Fig. S2. Conductivity of MAPI at  $\tau = 1$  ps.** Real part of high frequency conductivity (red dots) with error bars representing standard deviation by THz reflection measurement at  $\langle 111 \rangle$  facet, the power law fitting (solid line) with  $\omega^{-3.2 \pm 0.2}$ , the free electron case (dash dots) with  $\omega^{-2}$ , the large polaron limit (dash line) with  $\omega^{-2.5}$ , and the small polaron limit (short dash line) with a Gaussian shape rolling down.

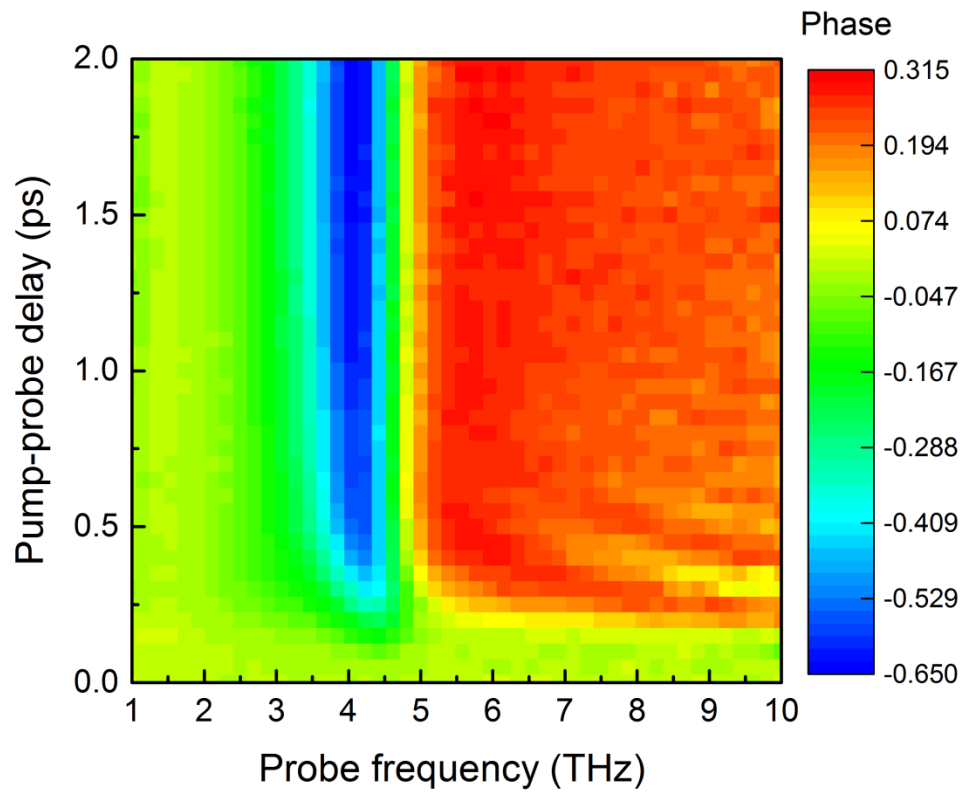

**Fig. S3. Phase of pump-induced differential THz reflectivity at the  $\langle 11\bar{1} \rangle$  facet.** Two-dimensional pump-probe delay time/probe frequency map of phase for  $\Delta r(\omega, \tau)/r_0$  at the  $\langle 11\bar{1} \rangle$  facet.

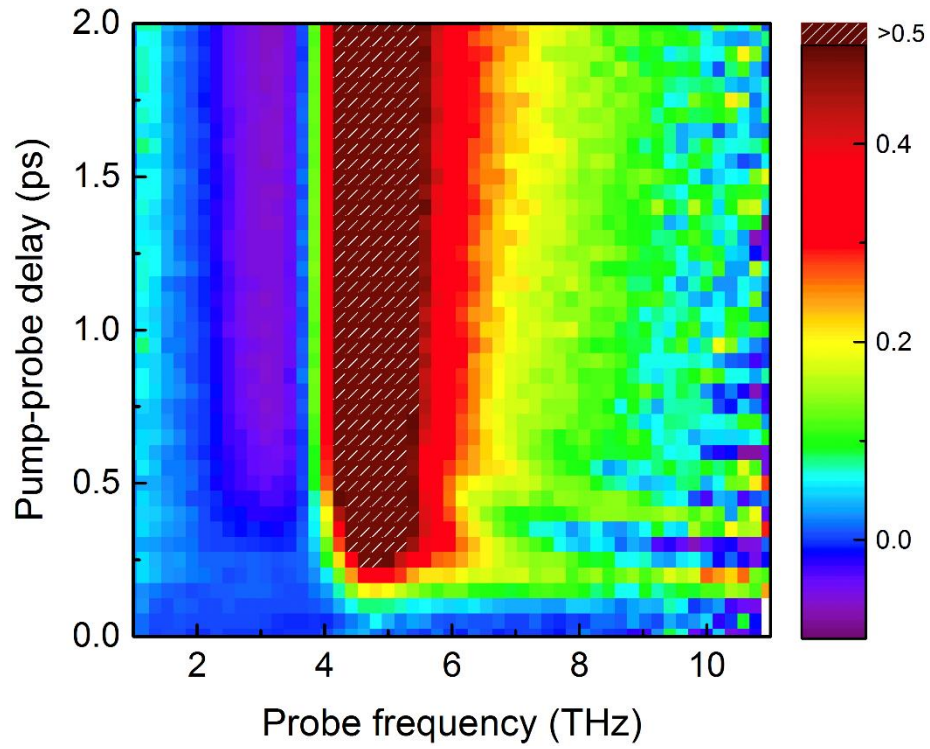

**Fig. S4. Amplitude of pump-induced differential THz reflectivity at the  $\langle 100 \rangle$  facet.** Two-dimensional pump-probe delay time/probe frequency map of phase for  $\Delta r(\omega, \tau)/r_0$  at the  $\langle 100 \rangle$  facet under the same TRTS measurement at the  $\langle 100 \rangle$  facet.

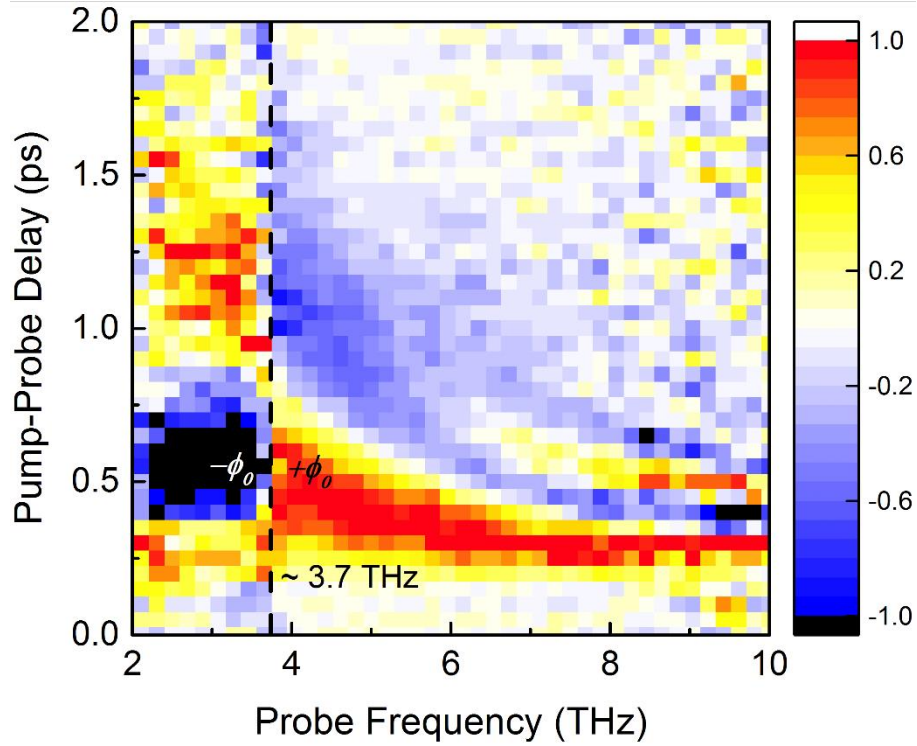

**Fig. S5. Time domain coherent oscillations of THz reflectivity without slow rise component at  $\langle 100 \rangle$  facet.** Normalized  $|\Delta r(\omega, \tau)|_{osc}^{norm}$  map with slow rise component subtracted. The vertical dash line marks the LO phonon frequency at 3.7 THz where a  $\pi$  phase flip occurs and above which a subsequent frequency chirp is evident.

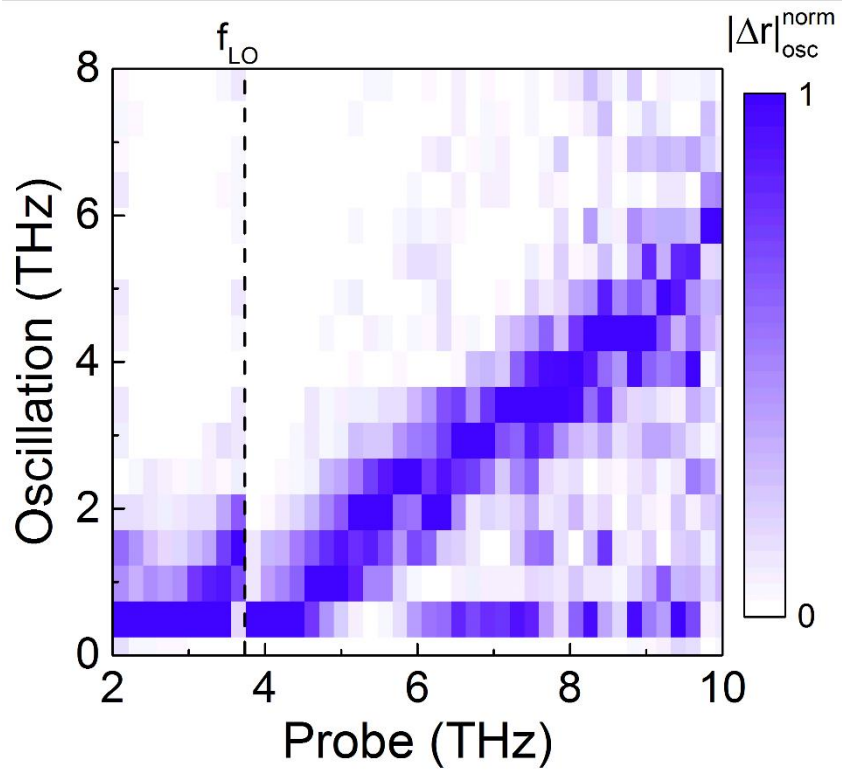

**Fig. S6. Fourier domain coherent oscillations of THz reflectivity without slow rise component at  $\langle 100 \rangle$  facet.** Fourier transformation along delay time axis  $\tau$ ,  $|\Delta r(\omega, \omega_{osc})|_{osc}^{norm}$ , showing a clear onset of a coherent beat between charge motion at  $\omega$  and  $\omega_{LO}$ . Information below 0.5 THz in oscillation is restricted by noise.

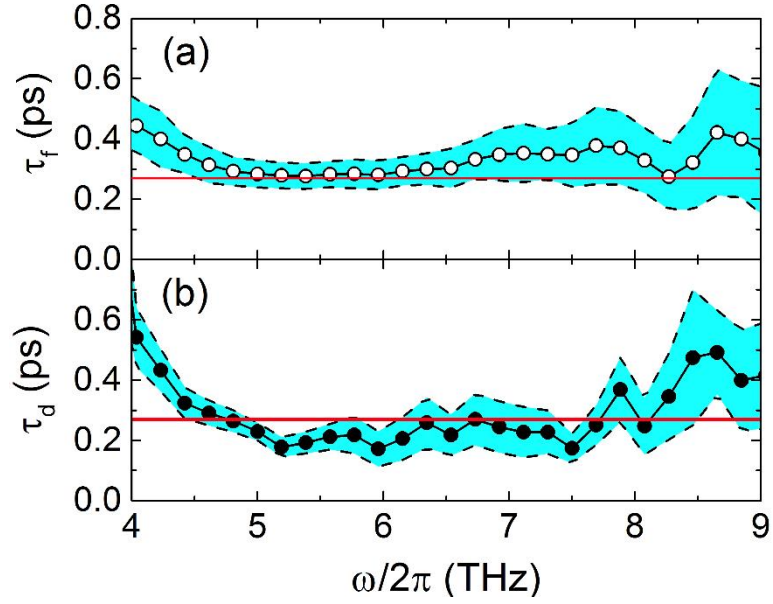

**Fig. S7. Time constants at  $\langle 100 \rangle$  facet.** (a) Reflectivity rising time constant  $\tau_r$  (open circles) with 95 % confidence bounds (shaded area). (b) Quantum beat dephasing time constant  $\tau_d$  (closed circles) with 95 % confidence bounds (shaded area). The red line marks one phonon period.



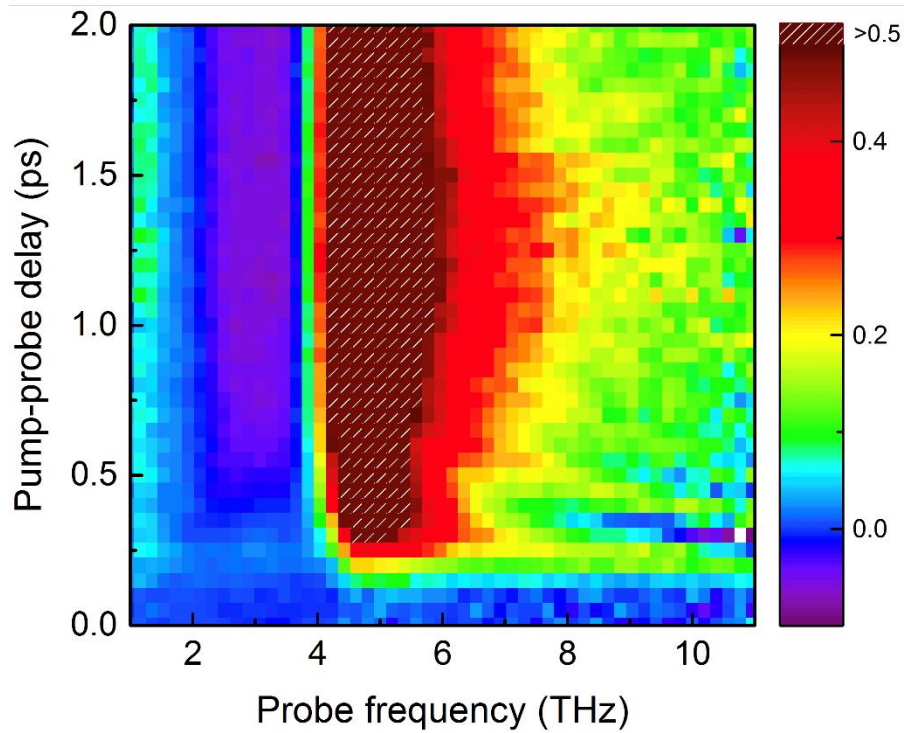

**Fig. S8. Amplitude of pump-induced differential THz reflectivity at  $\langle 111 \rangle$  facet.** Two-dimensional time/energy map of amplitude for  $\Delta r(\omega, \tau)/r_0$  for the  $\langle 111 \rangle$  facet, under the same TRTS measurement for the  $\langle 11\bar{1} \rangle$  facet.

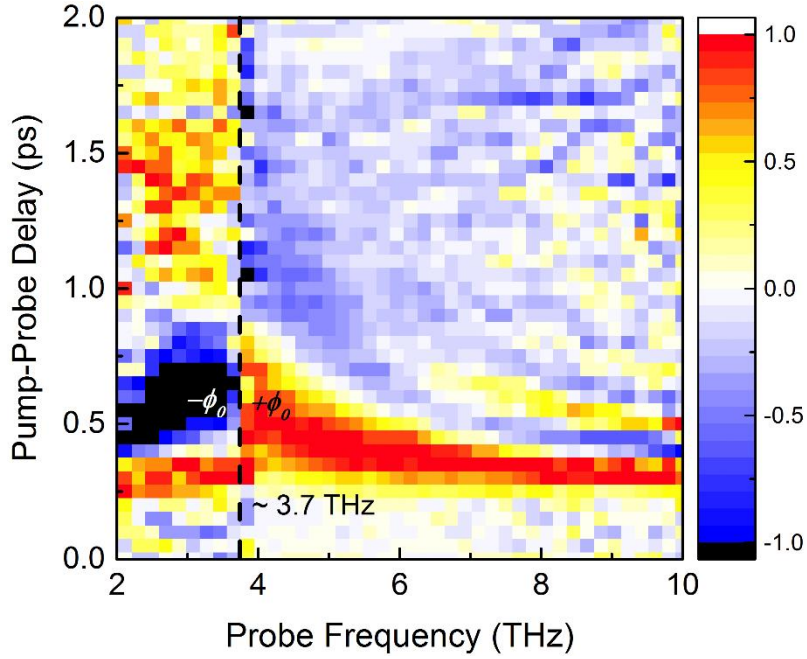

**Fig. S9. Time domain coherent oscillations of THz reflectivity without slow rise component at  $\langle 111 \rangle$  facet.** Normalized  $|\Delta r(\omega, \tau)|_{osc}^{norm}$  map with slow rise component subtracted. The vertical dash line marks the LO phonon frequency at 3.7 THz where a  $\pi$  phase flip occurs and above which a subsequent frequency chirp is evident.

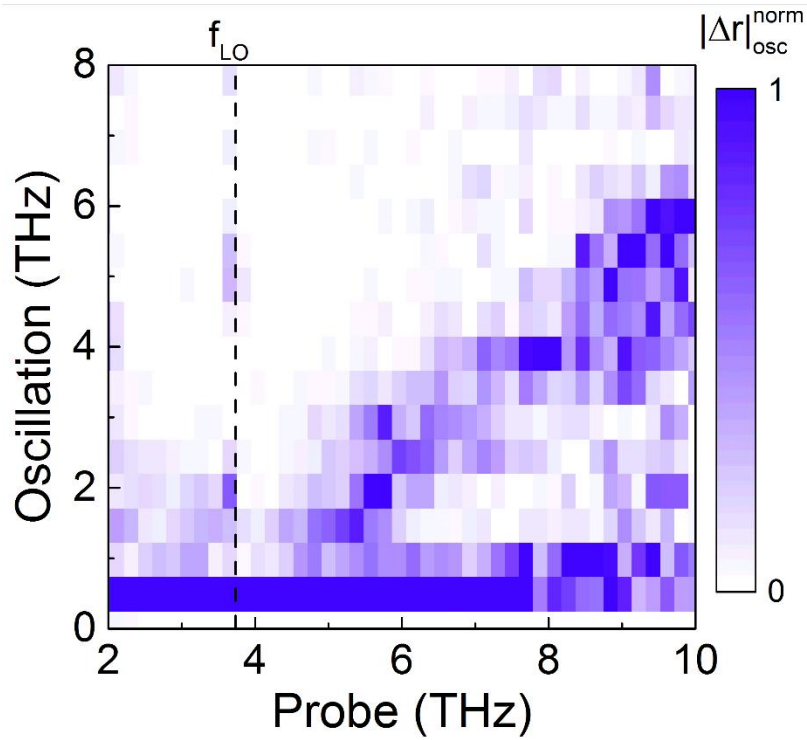

**Fig. S10. Fourier domain coherent oscillations of THz reflectivity without slow rise component at  $\langle 111 \rangle$  facet.** Fourier transformation along delay time axis  $\tau$ ,  $|\Delta r(\omega, \omega_{osc})|_{osc}^{norm}$ , showing a clear onset of a coherent beat between charge motion at  $\omega$  and  $\omega_{LO}$ . Information below 0.5 THz in oscillation is restricted by noise.

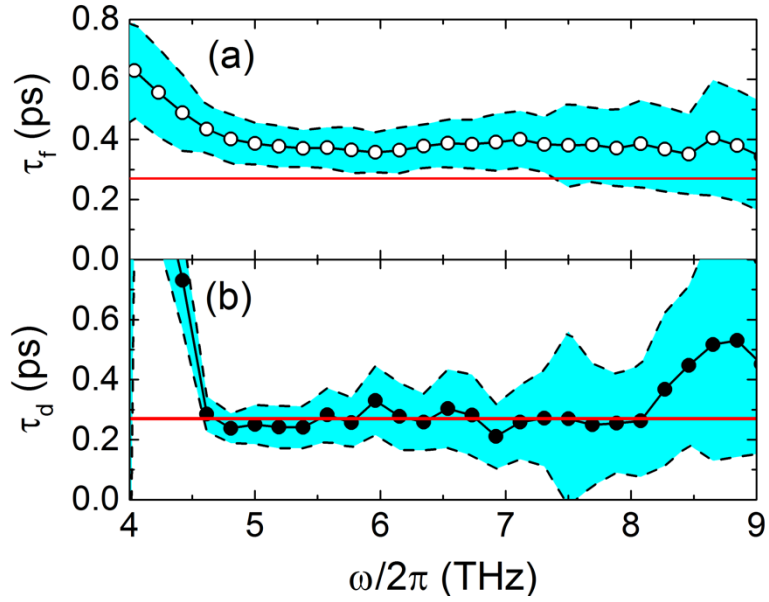

**Fig. S11. Time constants at  $\langle 111 \rangle$  facet.** (a) Reflectivity rising time constant  $\tau_r$  (open circles) with 95 % confidence bounds (shaded area). (b) Quantum beat dephasing time constant  $\tau_d$  (closed circles) with 95 % confidence bounds (shaded area). The red line marks one phonon period.

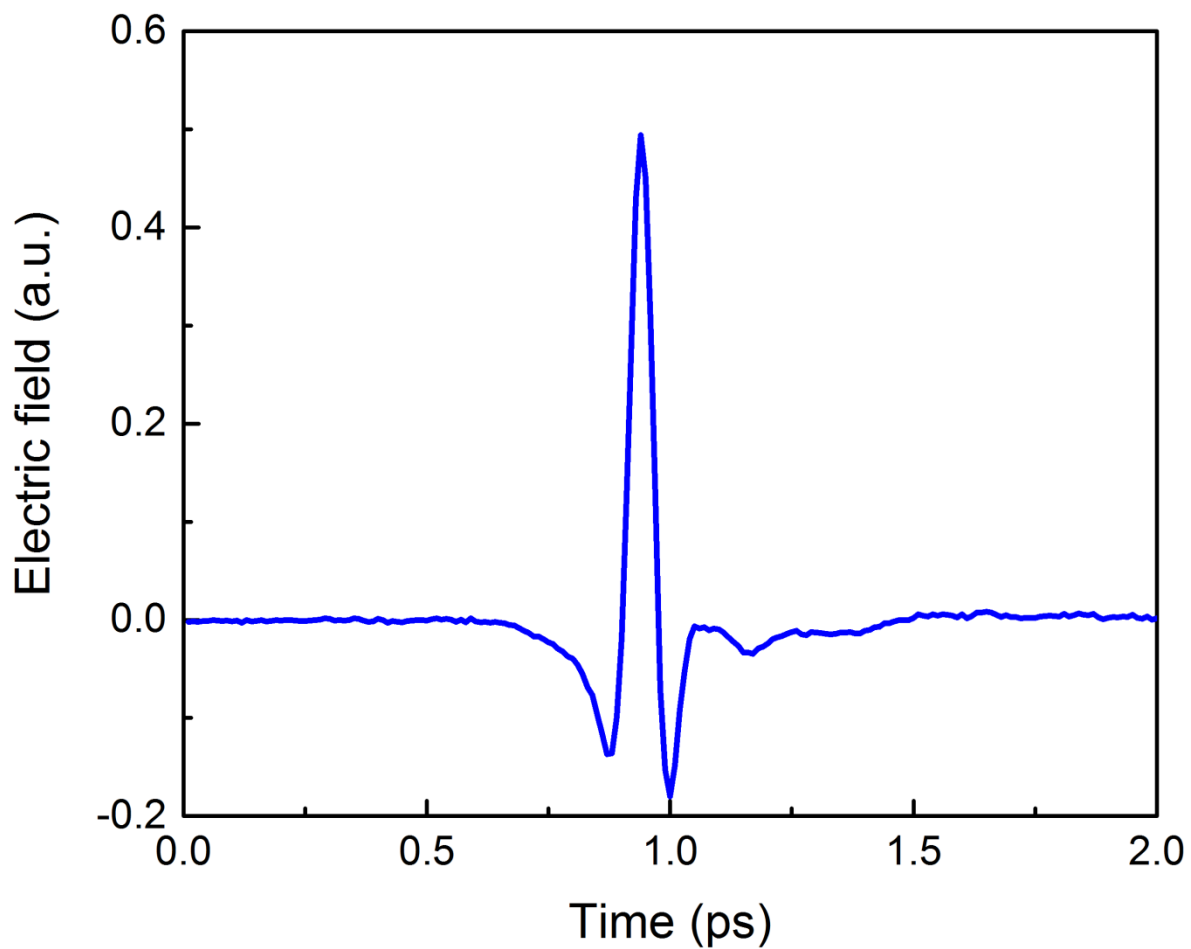

**Fig. S12. Electric field in time domain of the reference THz probe pulse.** The electric field is directly measured by air-biased-coherent-detection (ABCD), which gives both amplitude and phase information for the THz pulse.

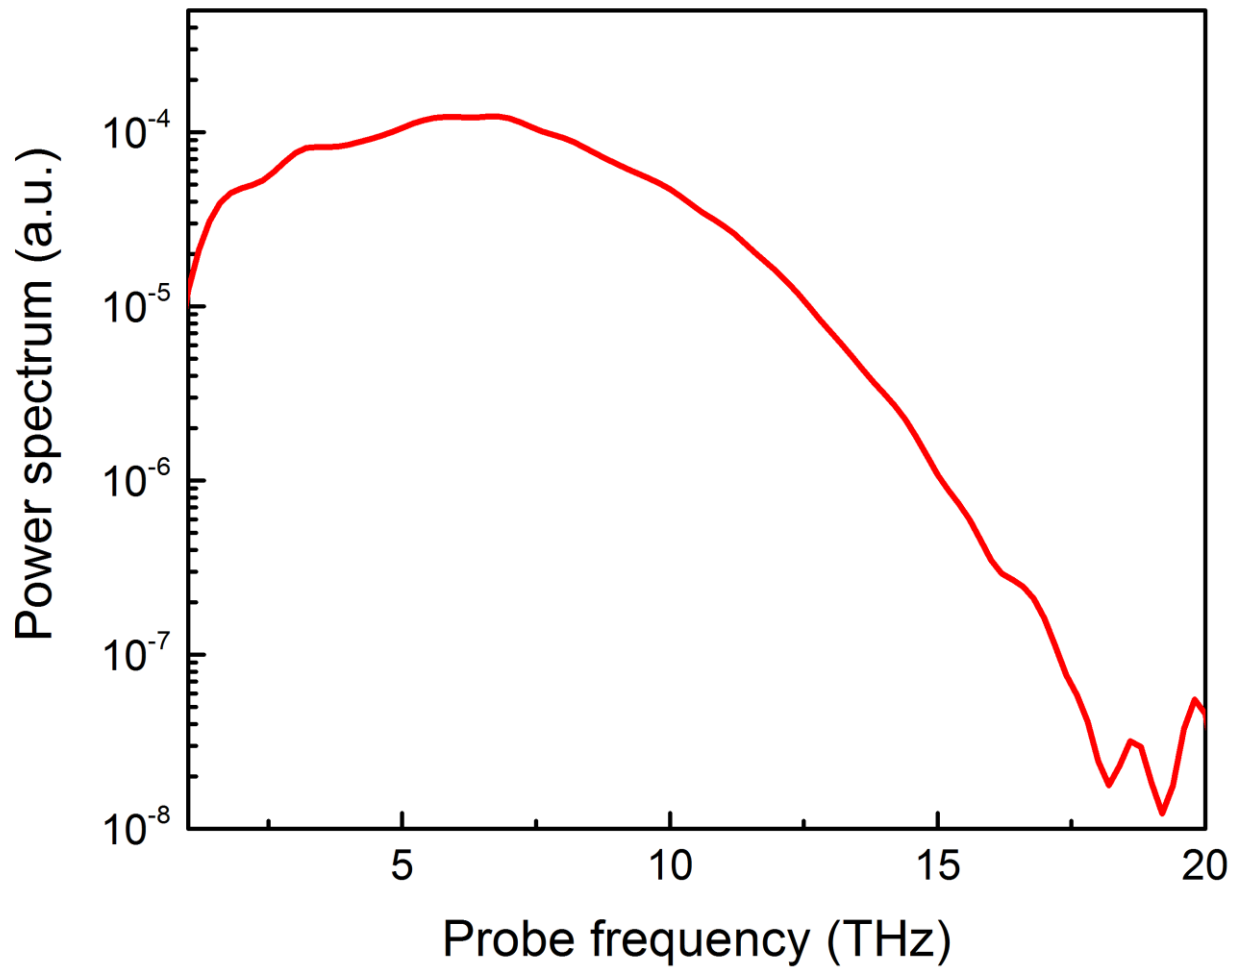

**Fig. S13. Power spectrum of the reference THz probe pulse.** This is calculated from Fourier transform of the measured THz electric field.

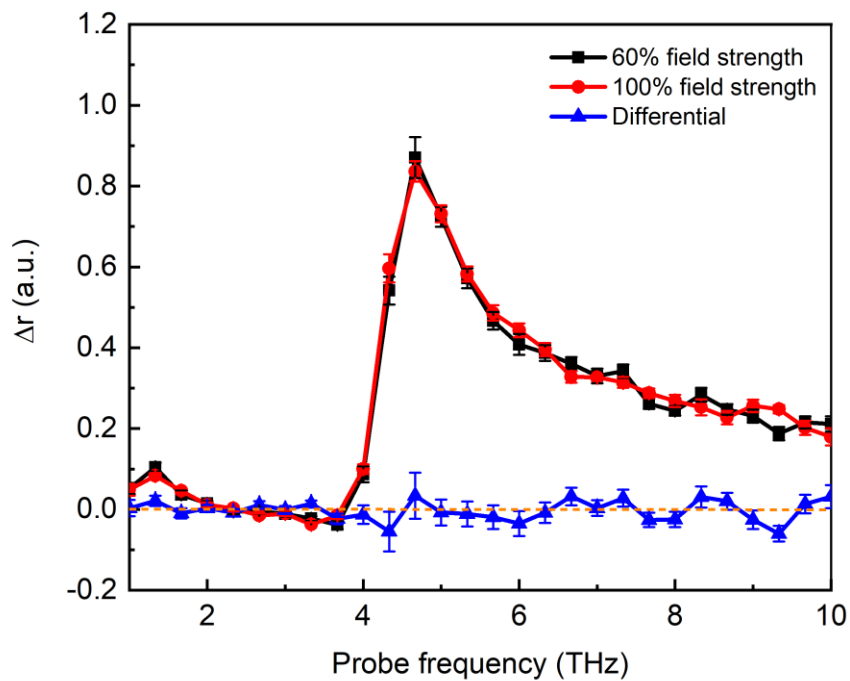

**Fig. S14. Pump-induced THz reflectivity change for different probe field strengths.** THz differential amplitudes are taken at a pump probe time delay of 250 fs after excitation for the full field strength used in the experiments and the probe field strength reduced by 60%. No variation in the response is observed, verifying linear response. The data corresponds to the red horizontal line cut in the differential reflectivity amplitude map in Fig. 2B of the manuscript (also shown in Fig. 2A.)

**Table S1. Parameters describing MAPI dielectric properties.** Electron effective mass ( $m^*$ ), LO phonon frequency ( $\omega_{LO}$ ), static and optical dielectric constants ( $\epsilon_S$  and  $\epsilon_\infty$ ).

| $m^*$          | $\hbar\omega_{LO}$ | $\epsilon_S$ | $\epsilon_\infty$ |
|----------------|--------------------|--------------|-------------------|
| $0.23m_0$ (37) | 15.3meV (33)       | 30 (31)      | 5.5 (23)          |
